# Supplementary material for: Charged Ferroelectric Domain Walls for Deterministic ac Signal Control at the Nanoscale
Source: PubMed Central journal article supplement (PMC8631726; doi:10.1021/acs.nanolett.1c03182), 2021-11-04
Supplement: nl1c03182_si_001.pdf [file nl1c03182_si_001.pdf]

# Charged ferroelectric domain walls for deterministic ac signal control at the nanoscale

*Jan Schultheiß<sup>1, \*</sup>, Erik Lysne<sup>1</sup>, Lukas Puntigam<sup>2</sup>, Jakob Schaab<sup>3</sup>, Edith Bourret<sup>4</sup>, Zewu Yan<sup>4,5</sup>,  
Stephan Krohns<sup>2</sup>, and Dennis Meier<sup>1, \*</sup>*

<sup>1</sup> Department of Materials Science and Engineering, Norwegian University of Science and Technology (NTNU), 7034, Trondheim, Norway

<sup>2</sup> Experimental Physics V, University of Augsburg, 86159, Augsburg, Germany

<sup>3</sup> Department of Materials, ETH Zurich, 8093, Zurich, Switzerland

<sup>4</sup> Materials Sciences Division, Lawrence Berkeley National Laboratory, 94720, Berkeley, CA, USA

<sup>5</sup> Department of Physics, ETH Zurich, 8093, Zurich, Switzerland

\*corresponding authors: jan.schultheiss@ntnu.no, dennis.meier@ntnu.no

## Supplementary Information

**Material.** High-quality single crystals were grown using the pressurized floating-zone method<sup>1</sup> and oriented by Laue diffraction with the polarization vector in-plane. The samples with a thickness of about 1 mm were cut and lapped with a 9  $\mu\text{m}$ -grained  $\text{Al}_2\text{O}_3$  water suspension and polished using silica slurry (Ultra-Sol® 2EX, Eminess Technologies, Scottsdale, AZ, USA) to produce a flat surface with a mean roughness of about 1.55 nm (determined by atomic force microscopy considering a  $25 \times 25 \mu\text{m}^2$  scan area).

**Local electric characterization.** Scanning probe microscopy measurements were performed on an NT-MDT Ntegra Prisma system (NT-MDT, Moscow, Russia). Voltages (a.c. and d.c.) for PFM, cAFM, and AC-cAFM measurements were applied through the bottom electrode using a function generator (Agilent 33220 A, Santa

Clara, CA, USA). All scans were performed using an electrically conductive diamond coated tip (DDESP-10, Bruker, Billerica, MA, USA) with a tip height of 10-15  $\mu\text{m}$  and a maximum tip radius of  $\approx 150$  nm. All measurements were carried out at room temperature ( $T \approx 25$   $^{\circ}\text{C}$ ).

For PFM measurements, the sample was excited using an a.c. voltage ( $f = 40$  kHz,  $V_{\text{a.c.}}^{\text{in}} = 1.5$  V), while the laser deflection was read out by lock-in amplifiers (SR830, Stanford Research Systems, Sunnyvale, CA, USA). The PFM response was calibrated on a periodically out-of-plane poled  $\text{LiNbO}_3$  sample (PFM03, NT-MDT, Moscow, Russia). For cAFM scans a d.c. voltage was applied ( $V_{\text{d.c.}}^{\text{in}} = 0.7$  V), while the sample response was read out using a low current head (SF005, NT-MDT, Moscow, Russia). In this frame, AC-cAFM is an extension of conventional cAFM measurements.<sup>2</sup> Here an a.c. voltage ( $0.1$  MHz  $< f < 10$  MHz,  $0.4$  V  $< V_{\text{a.c.}}^{\text{in}} < 1.13$  V) is applied to the bottom electrode. The low current head mimics a low pass filter with a cutoff frequency around 1 Hz, making the 0 Hz (also termed d.c. or rectified) component accessible. The recorded analog signal is then transferred to a digital signal and spatial resolution of the 0 Hz component (referred to as  $I_{\text{d.c.}}^{\text{out}}$ ) is provided by the atomic force microscope (a detailed description is provided in Figure S1).

**Macroscopic dielectric spectroscopy.** Macroscopic dielectric spectroscopy was carried out on the same single crystal also used for local electric characterization. Measurements were performed in a plate capacitor geometry, while both surfaces were coated with silver paint. Measurements were performed using an Alpha Analyzer (Novocontrol, Montabaur, Germany) together with a voltage booster option (HVB300, Novocontrol, Montabaur, Germany), covering a frequency range of  $10^{-4}$  to 10 MHz with varying applied bipolar voltages from  $V_{\text{a.c.}}^{\text{in}} = 1 - 20$  V. The measurement was performed at room temperature ( $T \sim 25^{\circ}\text{C}$ ). More details can be found in ref. 3. The fits of the macroscopic data were done using an equivalent circuit model, consisting of two  $RC$  circuits connected in series to describe the behavior of the bulk and the barrier independent of each other over the entire frequency regime. Note that the conductivity of the second  $RC$  element of this circuit (the internal contributions) consists of a resistor representing the intrinsic conductivity ( $\sigma_{\text{bulk}}$  in Figure 1d and 2c). In the macroscopic dielectric measurements, an additional contribution to the conductivity for the universal dielectric response ( $\sigma_{\text{UDR}}$ ),<sup>3, 4</sup> covering the influence of hopping transport on  $\sigma'(f) \propto f^n$  with exponent  $n < 1$ ,<sup>5, 6</sup> was utilized.

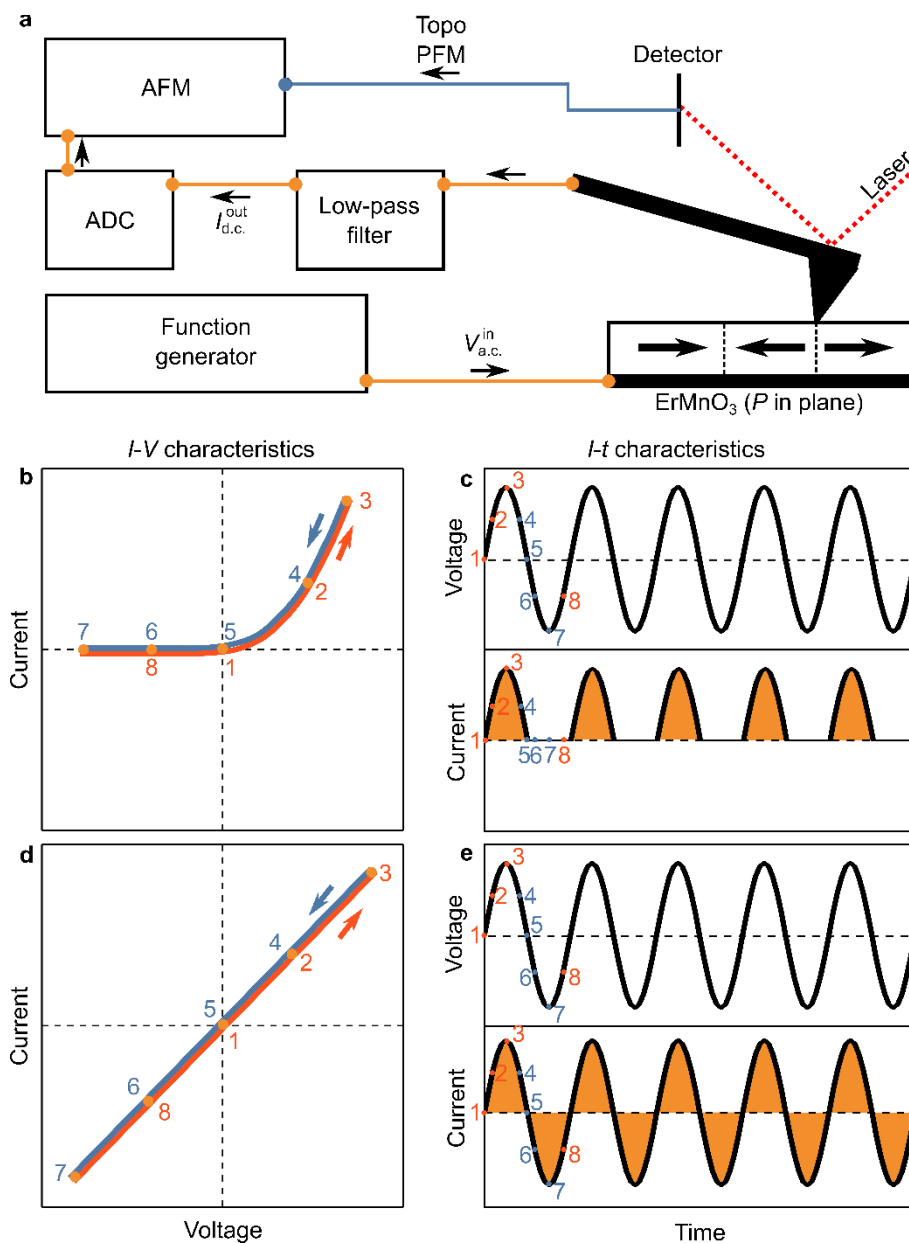

**Figure S1.** Principle of the AC-cAFM experiment. a) Electronic circuit used in AC-cAFM (wires carrying electrical and mechanical signals are displayed in orange and blue, respectively). An a.c. input voltage (with varying frequency,  $f$ , and amplitude,  $V_{a.c.}^{in}$ ) is applied to the bottom electrode, while a probe tip is scanned over the surface of the sample in contact mode. Instructive examples for asymmetric and symmetric  $I$ - $V$  characteristics and corresponding AC-cAFM responses are displayed in b), c) and d), e), respectively. b) For a Schottky-like tip-sample contact, the alternating input signal gets rectified.<sup>2, 7</sup> A typical  $I$ - $V$  curve as measured by cAFM on  $\text{ErMnO}_3$  is schematically depicted in b).<sup>8</sup> c) Illustration showing how the a.c. input voltage ( $V_{a.c.}^{in}$ ) leads to a d.c. current signal due to the asymmetric  $I$ - $V$  characteristics. The AC-cAFM signal ( $I_{d.c.}^{out} \neq 0$ ) represents the time-averaged current response (schematically illustrated by the orange areas). d), e) same as b), c) for the case of a symmetric  $I$ - $V$

curve, leading to  $I_{d.c.}^{out} = 0$ . To correlate the voltage- and time-dependent current representations, specific positions are labelled with numbers 1-9 in b)-e).

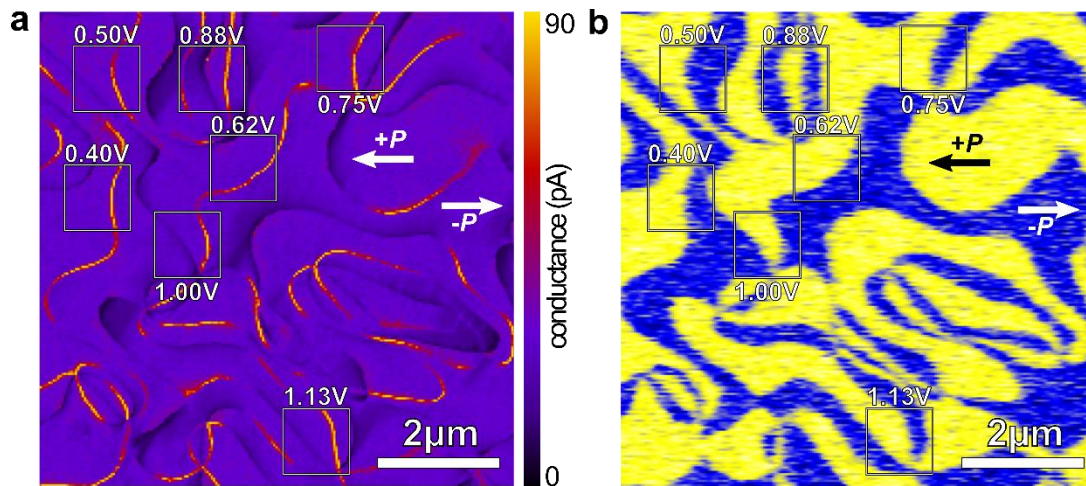

**Figure S2.** Positions of the voltage-dependent AC-cAFM scans in Figure 2. a) cAFM image ( $V_{d.c.}^{in} = 0.7$  V) and b) calibrated PFM overview scan at the same position recorded on a (110)-oriented  $\text{ErMnO}_3$  single crystal, featuring conductive tail-to-tail and insulating head-to-head domain walls (the polarization orientation,  $P$ , of the domains is indicated by the arrows). The frequency dependence of the AC-cAFM response of the conductive tail-to-tail domain walls inside the  $1.5 \times 1.5 \mu\text{m}^2$  boxes was systematically investigated under different  $V_{a.c.}^{in}$  (the respective  $V_{a.c.}^{in}$  is indicated). The results are displayed in Figure 2. The conductive domain walls were chosen for this comparative study since they have a quantitatively comparable d.c. conductance response.

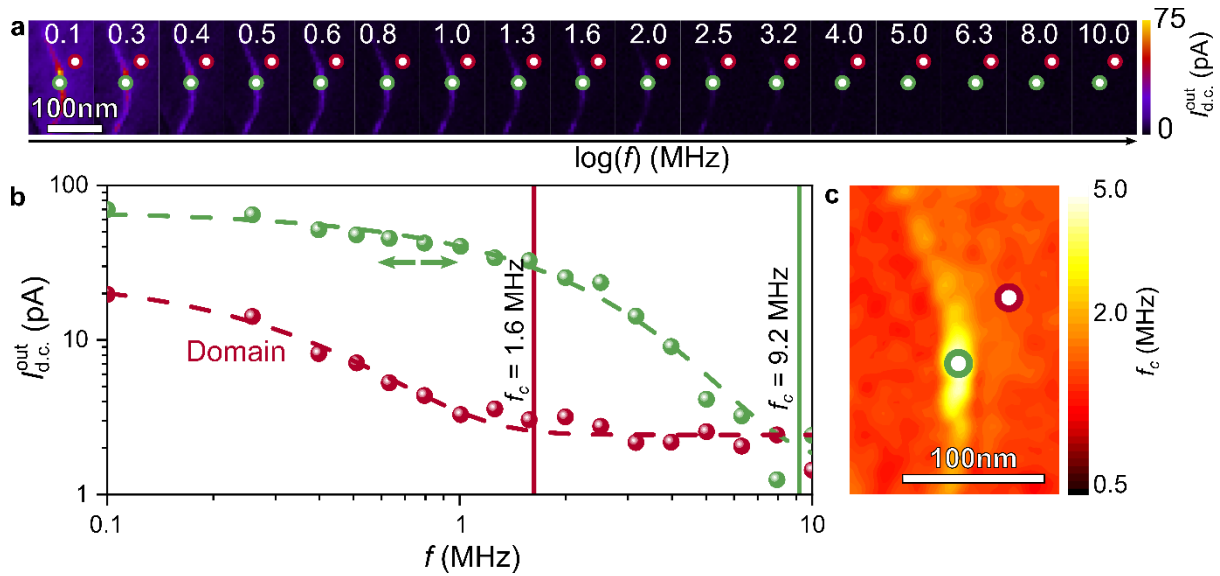

**Figure S3.** Spatial resolution of the cutoff frequency. a) A series of AC-cAFM scans is displayed at logarithmically increasing a.c. frequencies at the red and green marked positions at the tail-to-tail domain wall and within a domain. The frequency values (in MHz) are displayed in the respective AC-cAFM images. b) The quantitative value of the measured AC-cAFM contrast is evaluated for these two positions (one pixel corresponding to an area,  $A \sim 71 \cdot 10^3 \text{ nm}^2$ , estimated by the radius of the tip ( $r \approx 150 \text{ nm}$ )). An exponential decay function ( $f(f) = a \cdot \exp(-f/f_0) + c$ ) is fitted to the experimental data, with  $a$ ,  $f_0$ , and  $c$  as fitting parameters. Here,  $f_0$  represents the frequency at which 37% of the initial value of the AC-cAFM contrast is reached.<sup>9</sup> Exemplary fits are displayed in b as dashed lines. The cutoff frequency, at which the AC-cAFM contrast vanishes, is finally calculated as  $f_c = 5 \cdot f_0$  and is displayed for the two pixels as solid vertical lines in b. The factor 5 was chosen here, because the AC-cAFM signal reaches a value of less than 1 % of its original value.<sup>9</sup> The analysis was automatized for each pixel within the chosen area using a MatLab program to display the cutoff frequency spatially resolved, exemplarily shown for the investigated scan area in c). Figure 2b displays the results for a broad range of voltages.

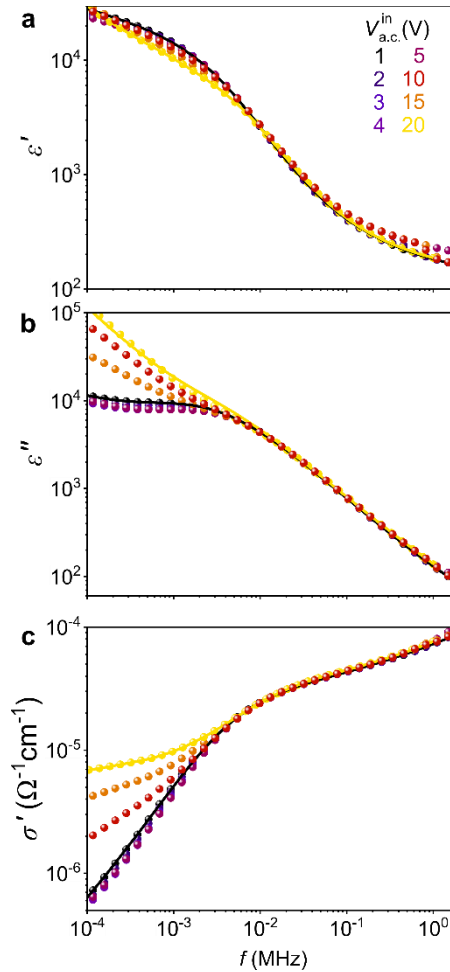

**Figure S4.** Frequency- and voltage-dependence of the macroscopic permittivity and conductivity. The frequency dependent permittivity (real,  $\epsilon'$ , and imaginary,  $\epsilon''$ , part) and conductivity,  $\sigma'$ , are displayed in a), b), and c), respectively. The data is measured under different voltages,  $V_{a.c.}^{in}$ . The solid lines represent fits of the experimental data utilizing the equivalent circuit model displayed in the inset of Figure 2c (extended by the universal dielectric response,<sup>5,6</sup> as described in the methods section).

## REFERENCES

1. Yan, Z.; Meier, D.; Schaab, J.; Ramesh, R.; Samulon, E.; Bourret, E. Growth of high-quality hexagonal  $\text{ErMnO}_3$  single crystals by the pressurized floating-zone method. *J. Cryst. Growth* **2015**, *409*, 75-79.
2. Schaab, J.; Skjærvø, S. H.; Krohns, S.; Dai, X. Y.; Holtz, M. E.; Cano, A.; Lilienblum, M.; Yan, Z. W.; Bourret, E.; Müller, D. A.; Fiebig, M.; Selbach, S. M.; Meier, D. Electrical half-wave rectification at ferroelectric domain walls. *Nat. Nanotechnol.* **2018**, *13*, 1028-1034.
3. Puntigam, L.; Schultheiß, J.; Strinic, A.; Yan, Z.; Bourret, E.; Althaler, M.; Kezsmarki, I.; Evans, D. M.; Meier, D.; Krohns, S. Insulating improper ferroelectric domain walls as robust barrier layer capacitors. *J. Appl. Phys.* **2021**, *129*, 074101.
4. Ruff, E.; Krohns, S.; Lilienblum, M.; Meier, D.; Fiebig, M.; Lunkenheimer, P.; Loidl, A. Conductivity Contrast and Tunneling Charge Transport in the Vortexlike Ferroelectric Domain Patterns of Multiferroic Hexagonal  $\text{YMnO}_3$ . *Phys. Rev. Lett.* **2017**, *118*, 036803.
5. Jonscher, A. K. The 'universal' dielectric response. *Nature* **1977**, *267*, 673-679.

6. Lunkenheimer, P.; Krohns, S.; Riegg, S.; Ebbinghaus, S. G.; Reller, A.; Loidl, A. Colossal dielectric constants in transition-metal oxides. *Eur. Phys. J Spec. Top.* **2010**, *180*, 61-89.
7. Wu, W.; Guest, J. R.; Horibe, Y.; Park, S.; Choi, T.; Cheong, S. W.; Bode, M. Polarization-Modulated Rectification at Ferroelectric Surfaces. *Phys. Rev. Lett.* **2010**, *104*, 217601.
8. Meier, D.; Seidel, J.; Cano, A.; Delaney, K.; Kumagai, Y.; Mostovoy, M.; Spaldin, N. A.; Ramesh, R.; Fiebig, M. Anisotropic conductance at improper ferroelectric domain walls. *Nat. Mater.* **2012**, *11*, 284-288.
9. Storey, N., *Electronics: a systems approach*. Pearson Education: 2006, p. 176.
